# Supplementary material
Source: publisher figshare collection journal article supplement (https://acs.figshare.com/ndownloader/files/4609909)
Supplement: Supplementary file 1 [file 4609909]

## Supporting Information

### Lipid-lowering (Hetero)Aromatic Tetrahydro-1,4-Oxazine Derivatives with Antioxidant and Squalene Synthase Inhibitory Activity

Angeliki P. Kourounakis<sup>a,\*</sup>, Christos Charitos<sup>b</sup>, Eleni A. Rekka<sup>c</sup>, Panos N. Kourounakis<sup>c</sup>

#### Table of Contents:

1. Preparation of intermediate and starting materials
2. <sup>1</sup>HNMR data for compounds **4**, **5**, **9**, **11**, **12**, **13**, **16**, **17**, **19**, **20** and **21**
3. Elemental Analyses data

1. Preparation of intermediate and starting materials

**Trans-2-methylamino-cyclohexanol:**<sup>22</sup> To a solution of cyclohexene oxide (55.7 mmol) in 20 mL methanol and 15mL aqueous solution (40%) of methylamine, was stirred for 19 h at RT. The product was isolated by vacuum distillation (bp<sub>4</sub> 66-69°C). Yield 70%.

**2-(4-Acetylphenyl)thiophene (23):**<sup>24</sup> To a solution of 4-bromoacetophenone (15 mmol) in dry tetrahydrofuran (40 ml), 2-(tributylstannyl)thiophene (16.5 mmol) and dichlorobis(triphenylphosphine) palladium II (0.75 mmol) were added under a nitrogen atmosphere.<sup>25</sup> The mixture was refluxed for 2 h, ether was added (160 ml), the mixture was filtered, the filtrate was concentrated and the residue was

flash chromatographed (ethyl acetate : petroleum ether 1: 7) to give 2-(4-acetylphenyl)thiophene. Yield 54%, m.p. 120-122 °C. <sup>1</sup>H-NMR (CDCl<sub>3</sub>) δ 2.60 (s, 3H), 7.10-8.05 (m, 7H).

**2-(4-Bromoacetylphenyl)thiophene (24) 2-Bromo-5-(4-bromoacetylphenyl)thiophene (25):** Bromine (25 mmol) was added to 2-(4-acetylphenyl)thiophene (23) (10 mmol) in chloroform (45 ml) with stirring. After 1 h at room temperature, the mixture was washed with a 5% NaOH solution, water, dried (Na<sub>2</sub>SO<sub>4</sub>), the solvent was distilled off and the residue (mixture of products 24 and 25) was flash chromatographed (petroleum ether : dichloromethane 1:2) to give 2-(4-bromoacetylphenyl)thiophene (24), yield 32%, m.p. 113-115 °C. <sup>1</sup>H-NMR (CDCl<sub>3</sub>) δ 4.50 (s, 2H), 7.10-8.07 (m, 7H), Anal. (C<sub>12</sub>H<sub>9</sub>BrOS· 0.3CH<sub>2</sub>Cl<sub>2</sub>), C, H, and 2-Bromo-5-(4-bromoacetylphenyl)thiophene (25), yield 33%, m.p. 130-132 °C. <sup>1</sup>H-NMR (CDCl<sub>3</sub>) δ 4.40 (s, 2H), 7.10-8.10 (m, 6H). Anal. (C<sub>12</sub>H<sub>8</sub>Br<sub>2</sub>OS), C, H.

**2-(Acetylphenyl)benzothiazole (26):**<sup>26</sup> A suspension of sodium hydride (128 mmol) in dry tetrahydrofuran was added slowly to a solution of 2-aminothiophenol (32 mmol) in dry tetrahydrofuran (80 ml). To this mixture 4-acetylbenzonitrile (32 mmol) in dry tetrahydrofuran (25 ml) was added slowly. The mixture was heated at 60 °C for 3 h, cooled, and a saturated aqueous NaCl solution (200 ml) was added. The precipitate was collected, dissolved in chloroform, washed with water, dried (Na<sub>2</sub>SO<sub>4</sub>), concentrated and flash chromatographed (chloroform), to give 2-(acetylphenyl) benzothiazole. Yield 35%, m.p. 180-190 °C (decom). <sup>1</sup>H-NMR (CDCl<sub>3</sub>) δ 2.68 (s, 3H), 7.40-8.20 (m, 8H).

**2-(4-Bromoacetylphenyl)benzothiazole (27):**<sup>27</sup> Bromine (7.64 mmol) was added to a stirred suspension of 2-(acetylphenyl)benzothiazole (26) (6.95 mmol) in chloroform (20 ml) and the mixture was refluxed for 1.5 h. The precipitate was collected, washed with cold chloroform and flash chromatographed (dichloromethane) to give 2-(4-bromoacetylphenyl)benzothiazole. Yield 40%, m.p. 151-152 °C. <sup>1</sup>H-NMR (CDCl<sub>3</sub>) δ 4.50 (s, 2H), δ 7.40-8.25 (m, 8H). Anal. (C<sub>15</sub>H<sub>10</sub>BrNOS), C, H, N.

**4-(2'-Fluorophenyl)acetophenone (28), 4-(4'-Fluorophenyl)acetophenone (29) and 4-(4'-Chlorophenyl)acetophenone (30):** A solution of (commercially available) 2-fluoro- or 4-fluoro- or 4

chloro-1,1'-biphenyl (15 mmol) in 30 mL dry carbon disulfide was stirred at room temperature, aluminum trichloride (33 mmol) was added and the mixture was refluxed for 5 min. Acetic anhydride (15 mmol) was added dropwise and the mixture was refluxed for 2 h. The reaction mixture was poured into crushed ice and hydrochloric acid 36% was added (5 ml). The product was extracted by ether, the organic phase was washed with water and sodium bicarbonate solution 5%, dried ( $\text{Na}_2\text{SO}_4$ ), concentrated and flash chromatographed (petroleum ether-ethyl acetate 15:1). 4-(2'-Fluorophenyl)acetophenone (28):<sup>28</sup> Yield: 31%, m.p. 78-80°C.  $^1\text{H}$ NMR ( $\text{CDCl}_3$ )  $\delta$  2.65 (s, 3H), 7.10-8.10 (m, 8H). 4-(4'-Fluorophenyl)acetophenone (29):<sup>29</sup> Yield 37.5%. m.p. 78-80°C.  $^1\text{H}$ NMR ( $\text{CDCl}_3$ )  $\delta$ : 2.65 (s, 3H), 7.11-8.10 (m, 8H). 4-(4'-Chlorophenyl)acetophenone (30):<sup>30</sup> Yield: 15%, m.p. 97-99°C.  $^1\text{H}$ NMR ( $\text{CDCl}_3$ )  $\delta$ : 2.70 (s, 3H), 7.40-8.12 (m, 8H).

**4-(2'-Fluorophenyl)-bromoacetophenone (31), 4-(4'-Fluorophenyl)bromoacetophenone (32), 4-(4'-Chlorophenyl)-bromoacetophenone (33):** A solution of 28 or 29 or 30 (12.78 mmol) in 18 mL chloroform was stirred at 10°C and bromine (5.39 mmol) was added dropwise. The reaction mixture was stirred for 1h and then diluted with 18 mL chloroform, washed with water, sodium bicarbonate solution 5%, dried ( $\text{Na}_2\text{SO}_4$ ) and concentrated to give the crude product. 4-(2'-Fluorophenyl)-bromoacetophenone (31):<sup>28</sup> was purified by recrystallisation from abs. ethanol. Yield: 65%, m.p. 71-73°C.  $^1\text{H}$ NMR: ( $\text{CDCl}_3$ )  $\delta$ : 4.5 (s, 2H), 7.10-8.12 (m, 8H). 4-(4'-Fluorophenyl)bromoacetophenone (32) was purified by flash chromatography (dichloromethane-petroleum ether 1:2) Yield: 70%, m.p. 102-103°C.  $^1\text{H}$ NMR: ( $\text{CDCl}_3$ )  $\delta$ : 4.5 (s, 2H), 7.10-8.10 (m, 8H). Anal. ( $\text{C}_{14}\text{H}_9\text{BrFO}$ ), C, H. 4-(4'-Chlorophenyl)-bromoacetophenone (33)<sup>31</sup> was purified by flash chromatography (petroleum ether-ethyl acetate 20:1). Yield: 65%, m.p. 125-127°C.  $^1\text{H}$ NMR ( $\text{CDCl}_3$ )  $\delta$ : 4.5 (s, 2H), 7.45-8.10 (m, 8H).

**4-(4'-Bromophenyl)-bromoacetophenone (34):**<sup>32</sup> Bromine (12.79 mmol) was added to a solution of (commercially available) 4-(4'-bromophenyl)acetophenone (11.63 mmol) in 25 mL chloroform, stirred at room temperature for 1 h, diluted with chloroform, washed with water, dried ( $\text{Na}_2\text{SO}_4$ ), concentrated

and flash chromatographed (dichloromethane-petroleum ether 3:2). Yield: 60%, m.p. 143-146°C.

$^1\text{H-NMR}$  ( $\text{CDCl}_3$ )  $\delta$ : 4.45 (s, 2H), 7.44-8.12 (m, 8H).

**2.  $^1\text{H-NMR}$  data for compounds 4, 5, 9, 11, 12, 13, 16, 17, 19, 20 and 21**

**3-[4-(2-Thienyl)phenyl]-octahydro-1,4-pyrido[2,1-c]oxazin-3-ol hydrobromide (4).**  $^1\text{H-NMR}$  ( $\text{CDCl}_3$ )  $\delta$  1.20-2.17 (m, 6H), 2.40-3.00 (m, 2H), 3.39-3.57 (m, 3H), 3.89 (dd,  $J_1=13.0$  Hz,  $J_2=3.0$  Hz, 1H), 4.22 (d,  $J=8.0$  Hz, 1H), 4.52 (dd,  $J_1=13.0$  Hz,  $J_2=3.0$  Hz, 1H), 6.92 (s, 1H), 7.05 (m, 1H), 7.26-7.32 (m, 1H), 7.59 (d,  $J=7.6$  Hz, 2H), 7.65 (d,  $J=8.0$  Hz, 2H), 10.9 (bs, 1H).

**2-[4-(2-Bromo-5-thienyl)phenyl]-4-methylmorpholin-2-ol hydrobromide (5).**  $^1\text{H-NMR}$  ( $\text{CDCl}_3$  with drops of  $\text{DMSO-d}_6$ )  $\delta$  2.60 (s, 3H), 3.10-3.20 (m, 5H), 3.70 (dd,  $J_1=12.6$  Hz,  $J_2=3.3$  Hz, 1H), 4.30 (dt,  $J_1=12.5$  Hz,  $J_2=3.2$  Hz, 1H), 6.74 (d,  $J=4.0$  Hz, 1H), 6.80 (d,  $J=4.0$  Hz, 1H), 7.22 (d,  $J=8.0$  Hz, 2H), 7.33 (d,  $J=8.0$  Hz, 2H), 10.05 (bs, 1H).

**2-[4-(2-Benzothiazolyl)phenyl]-4-methyl-octahydro-1,4-benzoxazin-2-ol hydrobromide (9).**  $^1\text{H-NMR}$  ( $\text{CDCl}_3$ )  $\delta$  1.20-1.48 (m, 4H), 1.80-2.40 (m, 4H), 2.70-3.00 (m, 5H), 3.10 (m, 1H), 3.70 (d,  $J=13.5$  Hz, 1H), 4.50 (m, 1H), 7.39-8.15 (m, 8H), 10.55 (bs, 1H).

**2-[4-(2-Fluorophenyl)phenyl]-4-methyl-morphonyl-2-ol hydrobromide (11).**  $^1\text{H-NMR}$  ( $\text{CDCl}_3+\text{DMSO-d}_6$ )  $\delta$  2.90 (s, 3H), 3.05-3.50 (m, 5H), 4.00 (dd,  $J_1=12.5$  Hz,  $J_2=3.2$  Hz, 1H), 4.60 (dt,  $J_1=12.0$  Hz,  $J_2=2.7$  Hz, 1H), 7.10-7.75 (m, 8H), 10.4 (bs, 1H).

**2-[4-(2-Fluorophenyl)phenyl]-4-methyl-octahydro-1,4-benzoxazine-2-ol hydrobromide (12).**  $^1\text{H-NMR}$  ( $\text{CDCl}_3+\text{DMSO-d}_6$ )  $\delta$  0.85-1.60 (m, 9H), 1.90 (m, 1H), 2.20 (s, 3H), 2.40 (m, 1H), 2.90 (d,  $J=11.6$  Hz, 1H), 3.60 (dt,  $J_1=11.6$  Hz,  $J_2=2.9$  Hz, 1H), 6.50-7.06 (m, 8H), 9.6 (bs, 1H).

**3-[4-(2-Fluorophenyl)phenyl]-octahydro-1,4-pyrido[2,1-c]oxazine-3-ol hydrobromide (13).**

<sup>1</sup>HNMR (CDCl<sub>3</sub>+DMSO-d<sub>6</sub>) δ 1.20-2.17 (m, 7H), 2.40-3.00 (m, 2H), 3.39-3.57 (m, 3H), 3.59 (dd, *J*<sub>1</sub>=13.0 Hz, *J*<sub>2</sub>=3.0 Hz, 1H), 3.89 (dt, *J*<sub>1</sub>=13.0 Hz, *J*<sub>2</sub>=2.0 Hz, 1H), 7.10-7.70 (m, 8H), 10.1 (bs, 1H).

**3-[4-(4-Chlorophenyl)phenyl]-octahydro-1,4-pyrido[2,1-c]oxazine-3-ol hydrobromide (16).**

<sup>1</sup>HNMR (CDCl<sub>3</sub>+DMSO-d<sub>6</sub>) δ 1.20-2.07 (m, 7H), 2.83-3.26 (m, 5H), 3.66 (dd, *J*<sub>1</sub>=12.1 Hz, *J*<sub>2</sub>=3.6 Hz, 1H), 4.10 (t, *J*=12.46 Hz, 1H), 7.10-7.70 (m, 8H), 10.08 (bs, 1H).

**2-[4-(4-Bromophenyl)phenyl]-4-methyl-morphonyl-2-ol hydrobromide (17).**

<sup>1</sup>HNMR (CDCl<sub>3</sub>+DMSO-d<sub>6</sub>) δ 2.37 (s, 3H), 2.90-3.00 (m, 4H), 3.30 (m, 1H), 3.50 (dd, *J*<sub>1</sub>=12.7 Hz, *J*<sub>2</sub>=3.3 Hz, 1H), 4.01 (dt, *J*<sub>1</sub>=12.5 Hz, *J*<sub>2</sub>=3.2 Hz, 1H), 6.88 (bs, 1H), 6.96-7.27 (m, 8H).

**3-[4-(4-Bromophenyl)phenyl]-octahydro-1,4-pyrido[2,1-c]oxazine-3-ol hydrobromide (19).**

<sup>1</sup>HNMR (CDCl<sub>3</sub>+DMSO-d<sub>6</sub>) δ 1.20-2.02 (m, 7H), 3.06-3.33 (m, 4H), 3.65 (m, 1H), 3.83 (d, *J*=12.3 Hz, 1H), 4.05 (t, *J*=12.5 Hz, 1H), 7.03-7.52 (m, 8H), 10.55 (bs, 1H).

**2-[4-(4-Fluorophenyl)phenyl]-4-methyl-morphonyl-2-ol hydrobromide (20).**

<sup>1</sup>HNMR (CDCl<sub>3</sub>+DMSO-d<sub>6</sub>) δ 2.70 (s, 3H), 2.80-3.40 (m, 5H), 3.80 (dd, *J*<sub>1</sub>=12.2 Hz, *J*<sub>2</sub>=3.0 Hz, 1H), 4.50 (dt, *J*<sub>1</sub>=12.1 Hz, *J*<sub>2</sub>=2.9 Hz, 1H), 6.90-7.50 (m, 8H), 9.5 (bs, 1H).

**2-[4-(4-Fluorophenyl)phenyl]-4-methyl-octahydro-1,4-benzoxazine-2-ol hydrobromide (21).**

<sup>1</sup>HNMR (CDCl<sub>3</sub>+DMSO-d<sub>6</sub>) δ 1.40-2.30 (m, 9H), 2.70 (s, 3H), 2.85 (m, 1H), 3.05 (d, *J*=11.6 Hz, 1H), 3.65 (d, *J*=11.6 Hz, 1H), 4.50 (dt, *J*<sub>1</sub>=11.0 Hz, *J*<sub>2</sub>=3.9 Hz, 1H), 6.50 (bs, 1H), 7.06-7.80 (m, 8H).

### 3. Elemental analyses data

| Compound | Formula                                   | % calculated | % found |
|----------|-------------------------------------------|--------------|---------|
| 2        | $C_{15}H_{18}BrNO_2S \cdot 0.5 H_2O$      | C 49.32      | C 49.13 |
|          |                                           | H 5.24       | H 5.19  |
|          |                                           | N 3.83       | N 3.77  |
| 3        | $C_{19}H_{24}BrNO_2S \cdot 2.2 H_2O$      | C 50.64      | C 50.61 |
|          |                                           | H 6.37       | H 6.31  |
|          |                                           | N 3.11       | N 3.46  |
| 4        | $C_{18}H_{22}BrNO_2S \cdot H_2O$          | C 52.05      | C 52.07 |
|          |                                           | H 5.85       | H 6.07  |
| 5        | $C_{15}H_{17}Br_2NO_2S \cdot H_2O$        | C 39.75      | C 40.1  |
|          |                                           | H 4.23       | H 4.28  |
|          |                                           | N 3.09       | N 3.29  |
| 6        | $C_{19}H_{23}Br_2NO_2S \cdot H_2O$        | C 44.99      | C 45.02 |
|          |                                           | H 4.97       | H 5.18  |
|          |                                           | N 2.76       | N 3.10  |
| 7        | $C_{18}H_{21}Br_2NO_2S$                   | C 45.99      | C 45.52 |
|          |                                           | H 4.45       | H 4.46  |
| 8        | $C_{18}H_{19}BrN_2O_2S$                   | C 53.08      | C 52.73 |
|          |                                           | H 4.7        | H 4.65  |
| 9        | $C_{22}H_{25}BrN_2O_2S \cdot 2H_2O$       | C 53.12      | C 52.87 |
|          |                                           | H 5.88       | H 5.80  |
|          |                                           | N 5.63       | N 5.69  |
| 10       | $C_{21}H_{23}BrN_2O_2S \cdot 0.6CH_2Cl_2$ | C 52.06      | C 52.17 |
|          |                                           | H 4.89       | H 4.94  |
|          |                                           | N 5.62       | N 5.75  |
| 11       | $C_{17}H_{19}BrFNO_2$                     | C 55.45      | C 55.60 |

|    |                                      |         |         |
|----|--------------------------------------|---------|---------|
|    |                                      | H 5.20  | H 5.21  |
|    |                                      | N 3.80  | N 4.20  |
| 12 | $C_{21}H_{25}BrFNO_2 \cdot 0.5H_2O$  | C 58.48 | C 58.45 |
|    |                                      | H 6.07  | H 5.91  |
|    |                                      | N 3.25  | N 3.06  |
| 13 | $C_{20}H_{23}BrFNO_2 \cdot 3H_2O$    | C 51.96 | C 52.37 |
|    |                                      | H 6.32  | H 6.67  |
| 14 | $C_{17}H_{19}BrClNO_2 \cdot 0.3H_2O$ | C 52.34 | C 52.25 |
|    |                                      | H 5.06  | H 5.07  |
|    |                                      | N 3.59  | N 3.65  |
| 15 | $C_{21}H_{25}BrClNO_2 \cdot 0.8H_2O$ | C 55.66 | C 55.65 |
|    |                                      | H 5.92  | H 5.94  |
|    |                                      | N 3.09  | N 3.22  |
| 16 | $C_{20}H_{23}BrClNO_2 \cdot H_2O$    | C 54.25 | C 54.09 |
|    |                                      | H 5.69  | H 5.72  |
|    |                                      | N 3.16  | N 3.50  |
| 17 | $C_{17}H_{19}Br_2NO_2$               | C 46.60 | C 46.51 |
|    |                                      | H 4.60  | H 4.25  |
| 18 | $C_{21}H_{25}Br_2NO_2$               | C 52.20 | C 51.85 |
|    |                                      | H 5.21  | H 4.98  |
| 19 | $C_{20}H_{23}Br_2NO_2 \cdot 0.5H_2O$ | C 50.23 | C 50.15 |
|    |                                      | H 5.06  | H 4.88  |
| 20 | $C_{17}H_{19}BrFNO_2$                | C 55.45 | C 55.19 |
|    |                                      | H 5.20  | H 5.27  |
|    |                                      | N 3.80  | N 3.96  |
| 21 | $C_{21}H_{25}BrFNO_2 \cdot 0.5H_2O$  | C 58.47 | C 58.45 |
|    |                                      | H 6.08  | H 5.91  |
|    |                                      | N 3.25  | N 3.06  |
| 22 | $C_{20}H_{23}BrFNO_2$                | C 58.83 | C 59.04 |

|    |                                   |         |         |
|----|-----------------------------------|---------|---------|
|    |                                   | H 5.68  | H 5.77  |
| 24 | $C_{12}H_9BrOS \cdot 0.3CH_2Cl_2$ | C 48.18 | C 48.23 |
|    |                                   | H 3.16  | H 2.98  |
| 25 | $C_{12}H_8Br_2OS$                 | C 40.03 | C 40.14 |
|    |                                   | H 2.24  | H 2.26  |
| 27 | $C_{15}H_{10}BrNOS$               | C 54.23 | C 53.96 |
|    |                                   | H 3.03  | H 3.10  |
|    |                                   | N 4.22  | N 4.10  |
| 32 | $C_{14}H_{10}BrFO$                | C 57.36 | C 57.50 |
|    |                                   | H 3.44  | H 3.46  |
